# Supplementary material
Source: PubMed Central journal article supplement (PMC3657620)
Supplement: mmc1.pdf [file mmc1.pdf]

Suppl Fig S1

**A**

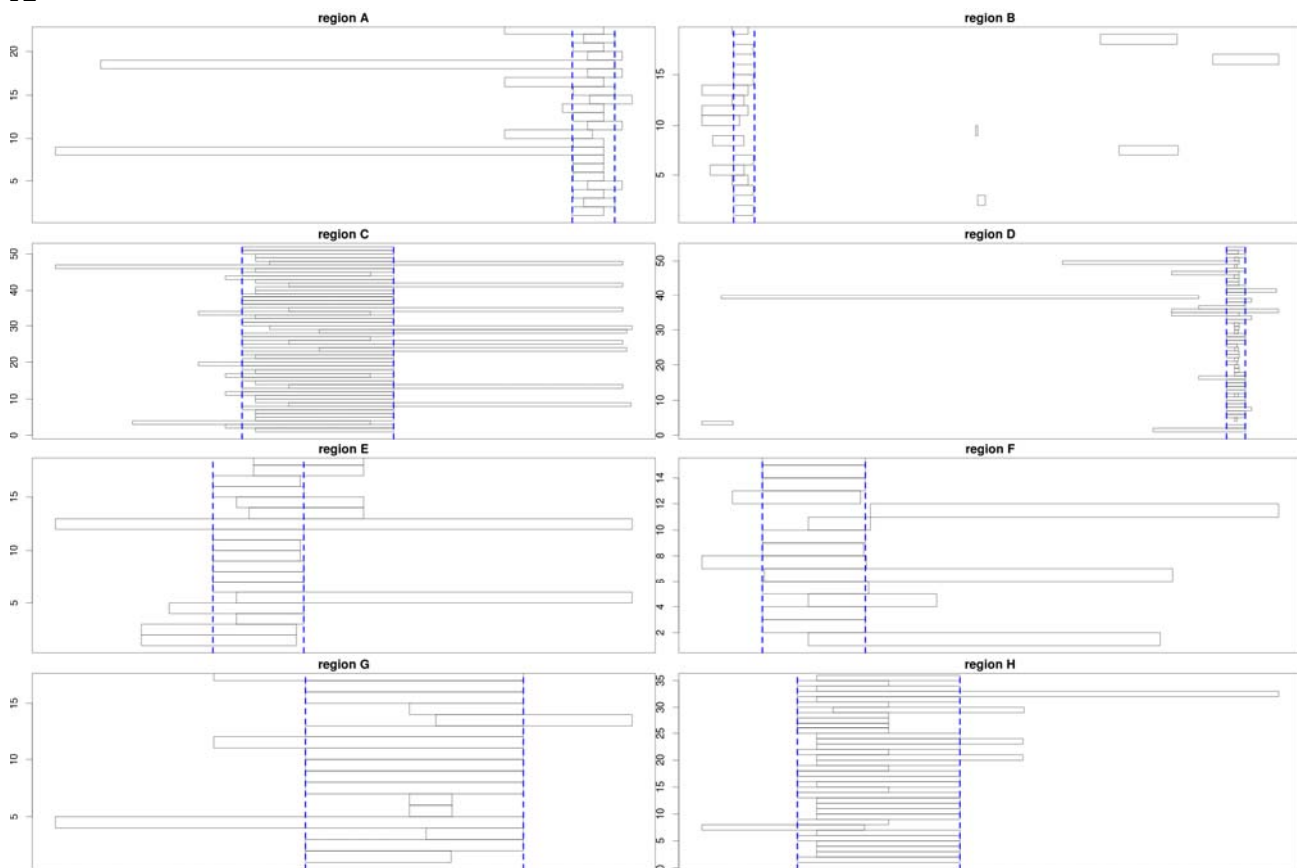

**B**

| Region   | No. of cases | Chromosome | Location on the chromosome |
|----------|--------------|------------|----------------------------|
| <b>A</b> | 22           | 9          | 68114425-68139090          |
| <b>B</b> | 16           | 9          | 71218907-71225721          |
| <b>C</b> | 51           | 9          | 125773267-125776488        |
| <b>D</b> | 53           | 10         | 46477257-46481072          |
| <b>E</b> | 18           | 14         | 94013466-94014186          |
| <b>F</b> | 14           | 15         | 18841467-18846679          |
| <b>G</b> | 17           | 16         | 9724760-9727866            |
| <b>H</b> | 35           | X          | 149943003-149946863        |
