# Supplementary material
Source: PubMed Central journal article supplement (PMC3657620)

# Suppl Fig S3

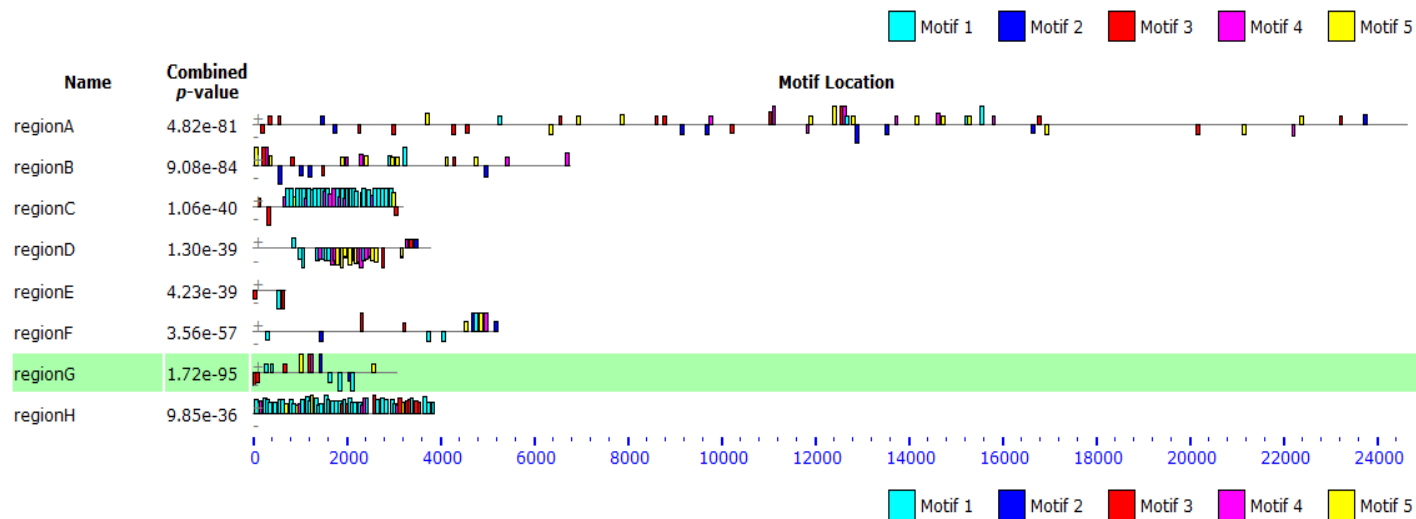

Supplement: mmc3.pdf [file mmc3.pdf]
